# Supplementary figures and images for: Identification of a new benzophenone from Psidium guajava L. leaves and its antineoplastic effects on human colon cancer cells
Source: Royal Society of Chemistry journal article supplement (doi:10.1039/c9fo00569b), 2019-01-01

## Supplementary Material

Fig. S1. The spectrum of HMBC.

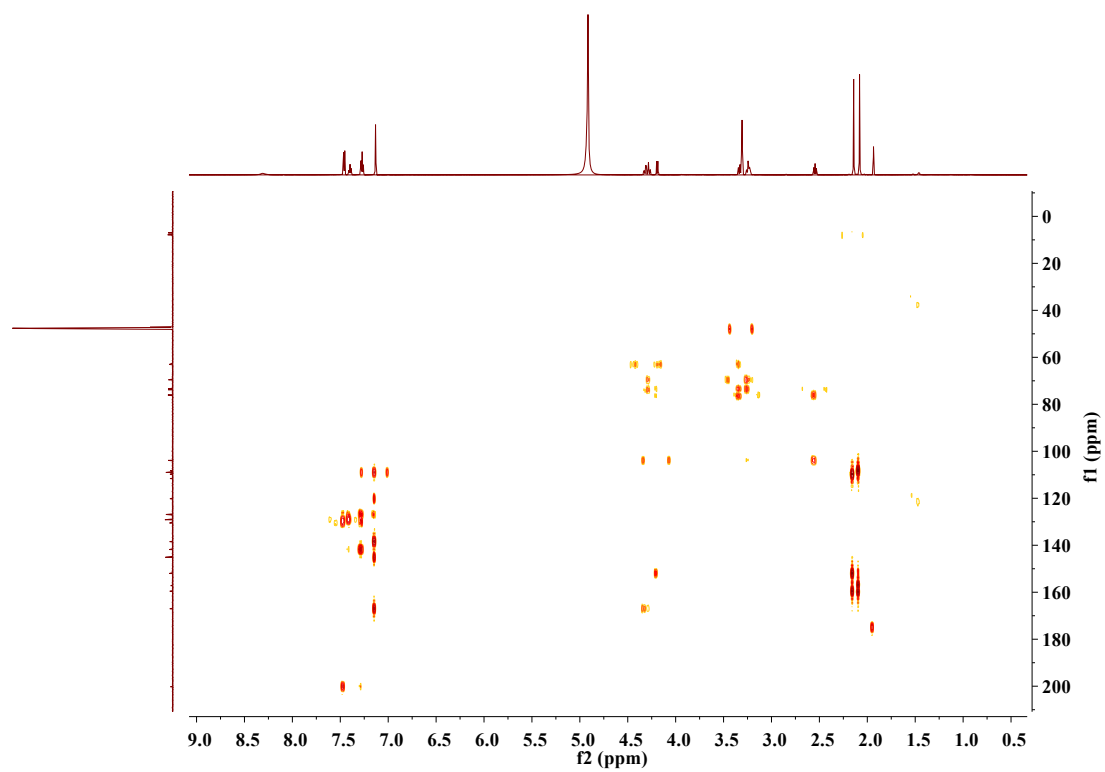

Supplement: c9fo00569b1.pdf [file c9fo00569b1.pdf]
